# Supplementary material
Source: publisher site journal article supplement (https://www.dovepress.com/article/297483)
Supplement: Supplementary file 1 [file get_supplementary_file.php]

| **Table S1: Hub genes in Alzheimer’s disease (brown module)** |  |
| --- | --- |
| PCSK1 |  |
| CALB1 |  |
| CRYM |  |
| FREM3 |  |
| AMPH |  |
| ENTPD3 |  |
| SYP |  |
| SLC10A4 |  |
| GREM2 |  |
| VSNL1 |  |
| PPM1E |  |
| FBXO40 |  |
| TPBG |  |
| PARM1 |  |
| PCP4L1 |  |
| BTBD11 |  |
| GPR22 |  |
| LY86-AS1 |  |
| ACOT7 |  |
| BEX5 |  |
| CD200 |  |
| DGAT2 |  |
| SLC27A2 |  |
| ENC1 |  |
| KCNS1 |  |
| B4GALT6 |  |
| IPCEF1 |  |
| PNMA6A |  |
| REEP1 |  |
| EPHX4 |  |
| EFNA3 |  |
| NAP1L2 |  |
| SYNGR3 |  |
| GNG2 |  |
| CHGA |  |
| NTSR1 |  |
| BEX1 |  |
| HPRT1 |  |
| PRPH2 |  |
| PKP3 |  |
| NEFL |  |
| ENO2 |  |
| CHN1 |  |
| SIDT1 |  |
| TMEM169 |  |
| ELOVL4 |  |
| RGS17 |  |
| MAP7D2 |  |
| MDH1 |  |
| GPR68 |  |
| CNTNAP2 |  |
| AKAP5 |  |
| SLC2A13 |  |
| SV2B |  |
| GPR61 |  |
| SLC4A10 |  |
| CEP72 |  |
| MAP2K1 |  |
| CAMK4 |  |
| NAP1L5 |  |
| MOAP1 |  |
| LPCAT4 |  |
| SEZ6L2 |  |
| UBE2T |  |
| BEX2 |  |
| TUBA4A |  |
| GPRASP1 |  |
| CTXN2 |  |
| PITHD1 |  |
| LRRC8B |  |
| RBM11 |  |
| WNT10B |  |
| RAB6B |  |
| LMO4 |  |
| ATP6V1B2 |  |
| YWHAH |  |
| PIP5K1B |  |
| ARHGAP20 |  |
| CDK5 |  |
| QPCT |  |
| ASPHD2 |  |
| BFSP1 |  |
| SYN2 |  |
| GRM7 |  |
| EPDR1 |  |
| AFF2 |  |
| WDR47 |  |
| BASP1 |  |
| PGM2L1 |  |
| CPLX1 |  |
| PEG10 |  |
| SH3BP5 |  |
| WDR54 |  |
| PLD3 |  |
| TMEM130 |  |
| DNAJC6 |  |
| AP1S1 |  |
| MEF2C |  |
| KCNIP4 |  |
| TMEM163 |  |
| KCNA3 |  |
| AGMAT |  |
| SRGAP3 |  |
| PLK2 |  |
| CAMKK2 |  |
| PDP1 |  |
| NCOA7 |  |
| SYNJ1 |  |
| C1orf216 |  |
| ACTA1 |  |
| OSBPL10 |  |
| HPCAL1 |  |
| NAPB |  |
| INPP4A |  |
| RNF41 |  |
| ARHGEF3 |  |
| CHRNB2 |  |
| DOK6 |  |
| PRKCB |  |
| CHCHD6 |  |
| YWHAG |  |
| ZNF280B |  |
| FXYD6 |  |
| PART1 |  |
| UNC5A |  |
| CISD1 |  |
| RIMKLA |  |
| VIPR1 |  |
| ITPR1 |  |
